# Supplementary material
Source: PubMed Central journal article supplement (PMC5350281)
Supplement: JB.00755-16_zjb999094348s1.pdf [file JB.00755-16_zjb999094348s1.pdf]

**Supplemental text to accompany** Wong et al. “The genome-wide transcriptional response to varying RpoS levels in *Escherichia coli* K-12”

## Determination of most stably expressed control genes for QPCR

Gene expression differences identified via quantitative PCR require control genes that do not respond to the experimental conditions. In this case, we need genes that do not respond to *rpoS* levels. For this criterion, we chose genes that were not significantly differentially expressed between RpoS levels, and that showed a low Pearson's correlation coefficient between RpoS level and expression level in our RNAseq data set. Because we were initially interested in the interaction of DNA supercoiling levels and RpoS levels in influencing gene expression, we also chose genes that had a low correlation between gene expression and supercoiling levels (1). From this set of genes that were insensitive to RpoS and supercoiling levels, we selected 10 candidate genes that had wide range of mean expression levels in our RNAseq data set (Table S3).

qPCR primers for each of the 10 genes were designed with melting temperatures between 58-61 °C and amplicon lengths of 100-150 bp. Primer concentrations were optimized by selecting primer concentrations giving the greatest band intensity with all other PCR conditions being the same. Three different concentrations (100, 300, and 500 nM) were used for each primer, giving a total of nine different primer conditions. PCR products from all nine conditions were run on a gel, and the product giving the most intense band had the optimal primer concentrations. Because the intermediate concentration, 300 nM of each primer, was either the most intense or nearly the most intense for each trial, this concentration was selected for all future experiments.

A circular problem arises when trying to validate control genes because it is difficult to ensure that a gene is consistently expressed without the use of a control gene to normalize expression to. For this reason, Vandesompele et al. (2) devised a method that determines which genes out of a set of candidate genes are most consistently expressed. Briefly, this method involves using ratios of expression between two genes across samples to determine consistency of expression and reduce experimental noise. For example, if one gene is consistently expressed twice as much as another, even if the absolute values of expression changes (due to experimental variation), we would determine that these genes were consistently expressed. By pairwise comparing ratios of expression of one candidate gene to all the others across samples, we can determine which genes are most consistently expressed.

To measure which potential control genes were in fact most stably expressed, we used RT-qPCR to measure expression from 4 samples each from cultures grown with 0%, 26%, 89% and 100% of wild-type RpoS levels. A standard curve for each gene was made using the following amounts of gDNA: 200ng, 20ng, 2ng, 200pg, 20pg, and 2pg.

We then used the method of Vandesompele et al. (2) to select the most stably expressed genes. We calculated the stability measure  $M$  for each gene. By ranking genes by their  $M$  value, we determined which gene is least stable. We then removed this gene and repeated the analysis with the remaining genes. By repeatedly eliminating the least stable gene and recalculating the  $M$  values, we ultimately ended up with only

two most stable genes (Figure S1). It is important to note that the elimination of the least stable gene can in fact impact the gene rankings in the subsequent rounds: for example, *hemL* is ranked 2<sup>nd</sup>, 3<sup>rd</sup>, and 4<sup>th</sup> in different rounds.

After determining which genes are most consistently expressed, it is important to also determine how many genes are needed to ensure reliable quantification. Vandesompele et al. (2) suggests creating a normalization factor (NF<sub>*n*</sub>) to normalize qPCR results to by using the geometric mean of expression of the *n* most stable genes. Furthermore, they suggest starting with the three most stable control genes and repeatedly adding the next most stable gene until the normalization factors are not significantly altered, indicating that the additional gene would not provide significantly different results. Fortunately, it appears that the use of three control genes is sufficient as there is a high correlation (Spearman's rho = 0.97) between the normalization factor for three genes (NF3) and the normalization factor for four genes (NF4).

We conclude that the three most stably expressed genes across RpoS levels were *ftsZ*, *pgm*, and *hemL*. These were used as control genes for all subsequent experiments.

#### Literature cited

1. **Peter BJ, Arsuaga J, Breier AM, Khodursky AB, Brown PO, Cozzarelli NR.** 2004. Genomic transcriptional response to loss of chromosomal supercoiling in *Escherichia coli*. *Genome Biol* **5**:R87.
2. **Vandesompele J, Preter KD, Pattyn F, Poppe B, Roy NV, Paepe AD, Speleman F.** 2002. Accurate normalization of real-time quantitative RT-PCR data by geometric averaging of multiple internal control genes. *Genome Biol* **3**:research0034.
3. **Haldimann A, Wanner BL.** 2001. Conditional-replication, integration, excision, and retrieval plasmid-host systems for gene structure-function studies of bacteria. *J Bacteriol* **183**:6384–93.
4. **Khlebnikov A, Datsenko KA, Skaug T, Wanner BL, Keasling JD.** 2001. Homogeneous expression of the PBAD promoter in *Escherichia coli* by constitutive

expression of the low-affinity high-capacity AraE transporter. *Microbiology* **147**:3241–3247.

5. **Baba T, Ara T, Hasegawa M, Takai Y, Okumura Y, Baba M, Datsenko KA, Tomita M, Wanner BL, Mori H.** 2006. Construction of *Escherichia coli* K-12 in-frame, single-gene knockout mutants: the Keio collection. *Mol Syst Biol* **2**:2006.0008.
6. **Butland G, Peregrín-Alvarez JM, Li J, Yang W, Yang X, Canadien V, Starostine A, Richards D, Beattie B, Krogan N, Davey M, Parkinson J, Greenblatt J, Emili A.** 2005. Interaction network containing conserved and essential protein complexes in *Escherichia coli*. *Nature* **433**:531–537.
7. **Datsenko KA, Wanner BL.** 2000. One-step inactivation of chromosomal genes in *Escherichia coli* K-12 using PCR products. *Proc Natl Acad Sci U S A* **97**:6640–6645.
8. **Stoebel DM, Hokamp K, Last MS, Dorman CJ.** 2009. Compensatory evolution of gene regulation in response to stress by *Escherichia coli* lacking RpoS. *PLoS Genet* **5**:e1000671.
9. **Edwards AN, Patterson-Fortin LM, Vakulskas CA, Mercante JW, Potrykus K, Vinella D, Camacho MI, Fields JA, Thompson SA, Georgellis D, Cashel M, Babitzke P, Romeo T.** 2011. Circuitry Linking the Csr and Stringent Response Global Regulatory Systems. *Mol Microbiol* **80**:1561–1580.



**Table S1** Strains and plasmids used in this study

| Strain          | Genotype                                                                                                                                                                                                                                  | Source         | Citation |
|-----------------|-------------------------------------------------------------------------------------------------------------------------------------------------------------------------------------------------------------------------------------------|----------------|----------|
| <b>Strains</b>  |                                                                                                                                                                                                                                           |                |          |
| BW23473         | F <sup>-</sup> , $\Delta(\text{argF-lac})169$ , $\Delta\text{idA3::pir}^+$ , <i>recA1</i> , <i>rpoS396(Am)?</i> , <i>endA9(del-ins)::FRT</i> , <i>rph-1</i> , <i>hsdR514</i> , <i>rob-1</i> , <i>creC510</i>                              | CGSC           | (3)      |
| BW27786         | $\Delta(\text{araD-araB})567$ , $\Delta\text{lacZ4787}(\text{:rrnB-3})$ , $\Delta(\text{araH-araF})570(\text{:FRT})$ , $\Delta\text{araEp-532}(\text{:FRT})$ , $\phi\text{Pcp13araE534}$ , $\Delta(\text{rhaD-rhaB})568$ , <i>hsdR514</i> | CGSC           | (4)      |
| JW5437          | $\Delta(\text{araD-araB})567$ , $\Delta\text{lacZ4787}(\text{:rrnB-3})$ , $\Delta\text{rpoS746}(\text{:kan})$ , $\Delta(\text{rhaD-rhaB})568$ , <i>hsdR514</i>                                                                            | CGSC           | (5)      |
| DMS2545         | BW27786, with $\Delta\text{rpoS746}(\text{:kan})$ from JW5437                                                                                                                                                                             | This study     |          |
| DMS2564         | BW27786 with $\Delta\text{nlpD}(\text{:kan-P}_{\text{araB}})$ , so that RpoS is under the control of $P_{\text{araB}}$                                                                                                                    | This study     |          |
| DMS2686         | <i>astA-lacZ</i> transcriptional fusion in pLFX, chromosomally integrated into DMS2564                                                                                                                                                    | This study     |          |
| DMS2687         | <i>astA</i> core promoter- <i>lacZ</i> transcriptional fusion in pLFX, chromosomally integrated into DMS2564                                                                                                                              | This study     |          |
| DMS2689         | <i>gadC-lacZ</i> transcriptional fusion in pLFX, chromosomally integrated into DMS2564                                                                                                                                                    | This study     |          |
| DMS2690         | <i>gadC</i> core promoter- <i>lacZ</i> transcriptional fusion in pLFX, chromosomally integrated into DMS2564                                                                                                                              | This study     |          |
| RPB104          | <i>rpoS-SPA</i> , in MG1655 background. Tagged allele moved from tagged DY330 strain by P1 transduction.                                                                                                                                  | This study     | (6)      |
| <b>Plasmids</b> |                                                                                                                                                                                                                                           |                |          |
| pKD46           | Plasmid for recombination of PCR products; <i>Amp</i> <sup>R</sup> , temperature-sensitive                                                                                                                                                | CGSC           | (7)      |
| pDMS123         | <i>otsB-gfp</i> fusion, <i>Cm</i> <sup>R</sup>                                                                                                                                                                                            | Charles Dorman | (8)      |
| pLFX            | Vector for <i>lacZ</i> transcriptional fusions, integrates at $\lambda$ attachment site; <i>Amp</i> <sup>R</sup>                                                                                                                          | CGSC           | (9)      |
| pPFINT          | Vector for integration; <i>Tet</i> <sup>R</sup> , <i>Amp</i> <sup>R</sup> , <i>ts</i>                                                                                                                                                     | CGSC           | (9)      |
| pAH150          | Plasmid source of $P_{\text{araB}}$ promoter                                                                                                                                                                                              | CGSC           | (3)      |
| pCP20           | Encodes <i>flp</i> recombinase; <i>ts</i> , <i>Amp</i> <sup>R</sup> , <i>Cm</i> <sup>R</sup>                                                                                                                                              |                | (7)      |

**Table S2 Primers used in this study.** Underlined bases indicate restriction enzyme recognition sites.

| Primer name       | Sequence                                                                                          |
|-------------------|---------------------------------------------------------------------------------------------------|
| ParaBRpoSRecomb-F | CCTGGATTTTTCTGGTATTTTGCCGCAGGTCAGCGTATG<br>GTATCGAACCCCAGAGTCC                                    |
| ParaBRpoSRecomb-R | ATCTTCATTTAAATCATGAACTTTCAGCGTATTCTGACTCAT<br>ATGGCTTGACTCCGTACA                                  |
| astApromoter+     | TTTGGTACCGTGCTTTTCGACGATGGCTT                                                                     |
| astApromoter-     | TTTGAATTCCTCTTTCCCCTGCTGATCCC                                                                     |
| gadCpromoter+     | AAAGGTACCGGTAGAGAATGTTAACACTGCCG                                                                  |
| gadCpromoter-     | AAAGAATTCCGTCATTGATAATCTGGAATGCCA                                                                 |
| astA-35to+1for    | TTTGGTACCCTGGCTGGCACGAACCCTGCAATCTACATTT<br>ACAGCGGAATTCTTT                                       |
| astA-35to+1rev    | AAAGAATTCGCTGTAAATGTAGATTGCAGGGTTCGTGCC<br>AGCCAGGGTACCAAA                                        |
| gadC-35to+1for    | CCCGGTACCCTTGCTTACTTTATCGATAAATCCTACTTTTTT<br>AATGCGAATTCCCC                                      |
| gadC-35to+1rev    | GGGGAATTCGCATTAATAAAGTAGGATTTATCGATAAAGTA<br>AGCAAGGGTACCGGG                                      |
| hdeAHiFi+         | TCTAGAGGATCCCCGGGTACACAGCAGCACGGCAATAA                                                            |
| hdeAHiFi-         | TCGGTTGTTCGGATCCCCGGGCTGGCAGAAGAAGCAGAC                                                           |
| gadAHiFi+         | TCTAGAGGATCCCCGGGTACCTGAACGGGGTGTACACG                                                            |
| gadAHiFi-         | TCGGTTGTTCGGATCCCCGGGCGGAAATCGTTTTGACTC                                                           |
| hdeAcoreHiFi      | TGACTCTAGAGGATCCCCGGGTACTGACATATACAGAAA<br>ACCAGGTTATAACCTCAGTGAATTCCCGGGGATCCGACAA<br>CCGAT      |
| gadAcoreHiFi      | TGACTCTAGAGGATCCCCGGGTACGCCTTGCTTCCATTG<br>CGGATAAATCCTACTTTTTTATTGCAATTCCCGGGGATCCG<br>ACAACCGAT |

**Table S3.** Candidate control genes, primer sequences, and information used in the selection of the genes.

| <b>Gene</b> | <b>Primer sequences</b>                        | <b>Supercoiling correlation</b> | <b>RpoS correlation</b> | <b>Mean expression across RpoS levels (AU)</b> |
|-------------|------------------------------------------------|---------------------------------|-------------------------|------------------------------------------------|
| <i>gatY</i> | AATGCGAGGCGTCAATCATG<br>AAAATCTGTTGGCGCTGGTC   | 0.14                            | 0.15                    | 7917                                           |
| <i>talB</i> | AAACAGCAGAGCAACGATCG<br>AAGACGCGCATCAACTTCAG   | 0.05                            | 0.15                    | 215                                            |
| <i>ynaJ</i> | TCGGCGGCGTTATAGAACAG<br>GCCAGCAACACAGTAAAGACC  | 0.03                            | 0.19                    | 487                                            |
| <i>crp</i>  | TGCGTTTGTCTGCACAGATG<br>TAGCGTCTGGTTGTTTTGCC   | 0.10                            | 0.18                    | 4008                                           |
| <i>thrS</i> | TTGGTATGCGGCCAAAGTTG<br>AAAACGACGCACAACACTGTCG | 0.26                            | 0.14                    | 521                                            |
| <i>ftsZ</i> | TGCATTTGCTTCCGACAACG<br>ACGTTTGTCCATGCCGATAC   | 0.003                           | 0.18                    | 399                                            |
| <i>pgm</i>  | TGATTAACGTGCGCCAACTG<br>AATGTGCGGCTCGTTAAAGC   | 0.06                            | 0.18                    | 59                                             |
| <i>speD</i> | ACGTTACACATCCACCATGTC<br>TTTACCCGCGACATTAACGG  | 0.02                            | 0.08                    | 168                                            |
| <i>hemL</i> | TTCACCATGCGCACCATATC<br>AATCCGCAATGCCGTGATTG   | 0.01                            | 0.19                    | 85                                             |
| <i>tehB</i> | TGTGGCAATGGTCGTAACAG<br>TTAATGCGCTCGACGTTGG    | 0.06                            | 0.07                    | 145                                            |



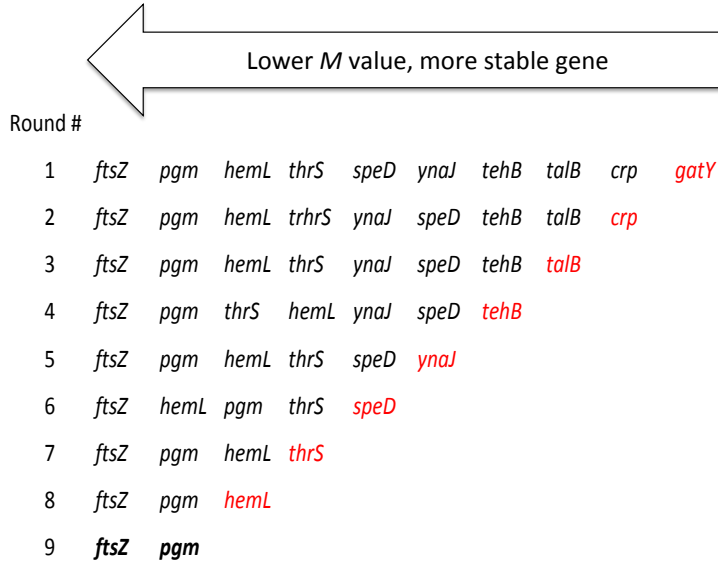

**Figure S1. A ranking of the ten candidate control genes.** In each round, the genes were ranked with the most stable (lowest  $M$  value) gene on the left and the least stable gene (highest  $M$  value) in red. After each round, the least stable gene was removed and the calculation and ranking by  $M$  value repeated. From this, *ftsZ* and *pgm* are the two most stable genes.

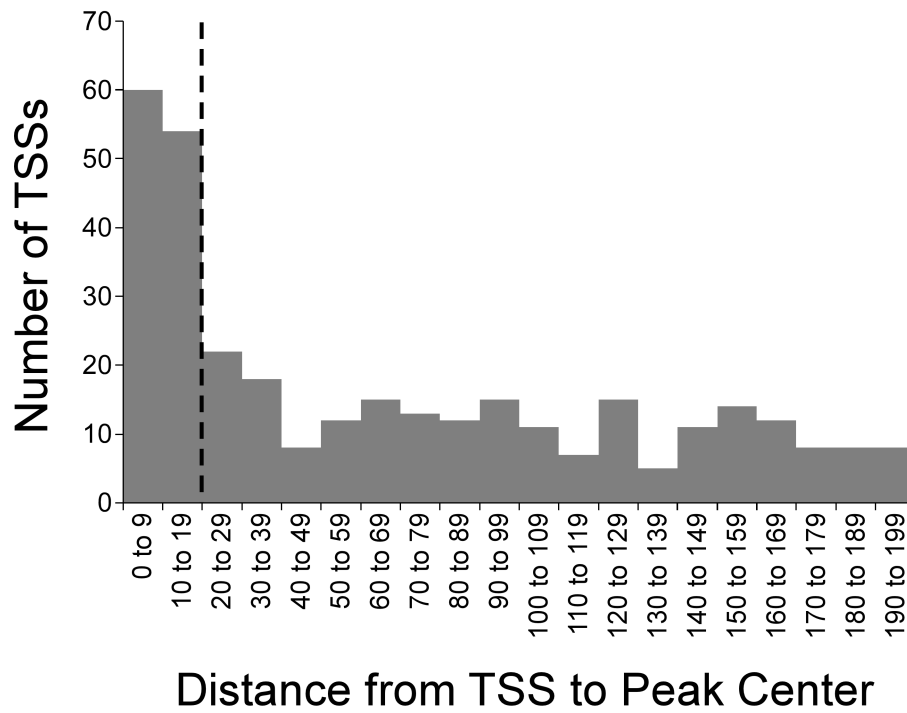

**Figure S2.** Histogram showing the frequency distribution of distances between ChIP-seq peak centers and TSSs identified during stationary phase growth in minimal medium. The black, vertical, dashed line indicates the cut-off used for calling TSSs as being associated with an RpoS ChIP-seq peak.
